# Supplementary material for: Simple procedure for vacant POM-stabilized palladium (0) nanoparticles in water: structural and dispersive effects of lacunary polyoxometalates
Source: Royal Society of Chemistry journal article supplement (doi:10.1039/c4ra03104k), 2014-01-01
Supplement: c4ra03104k1.pdf [file c4ra03104k1.pdf]

# Simple procedure for vacant POMs-stabilized palladium (0) nanoparticles in water: structural and dispersive effects of lacunary polyoxometalates

R. Villanneau,<sup>\*a,b</sup> A. Roucoux,<sup>\*c</sup> P. Beaunier,<sup>d,e</sup> D. Brouri,<sup>d,e</sup> and A. Proust<sup>a,b</sup>

## Supplementary Informations

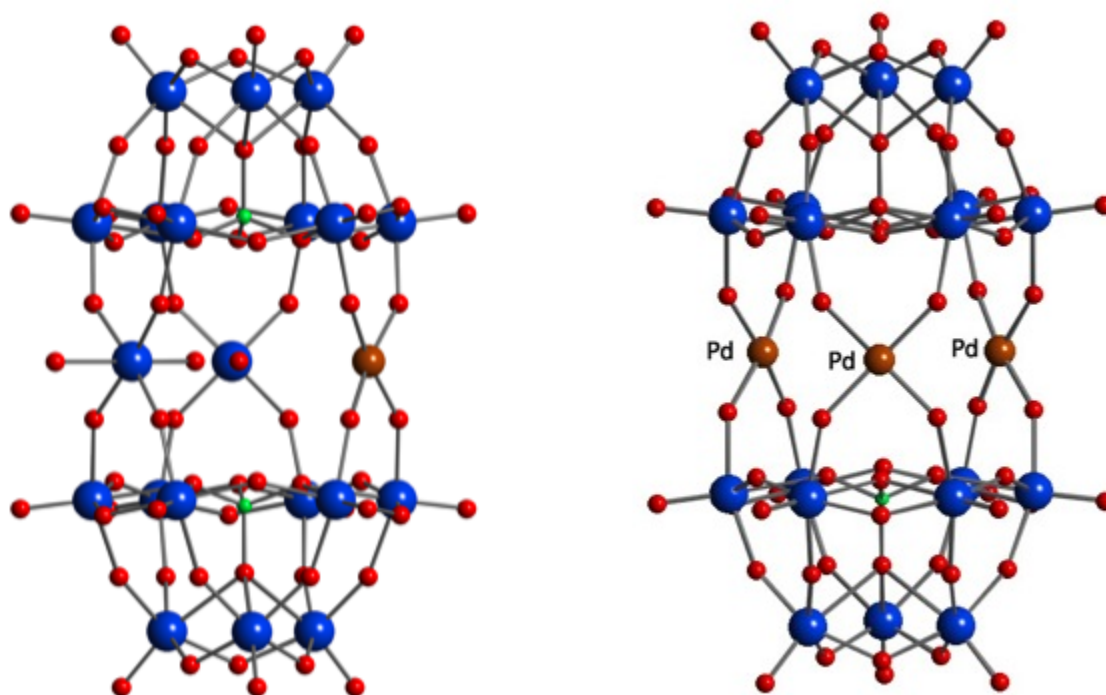

Fig S1: Structural representation of the anions  $[\text{Pd}\{\text{P}_2\text{W}_{20}\text{O}_{70}(\text{H}_2\text{O})_2\}]^{8-}$  anion of **1** (left) and  $[\text{Pd}_3\{\text{PW}_9\text{O}_{34}\}_2]^{12-}$  anion of **2** (right).

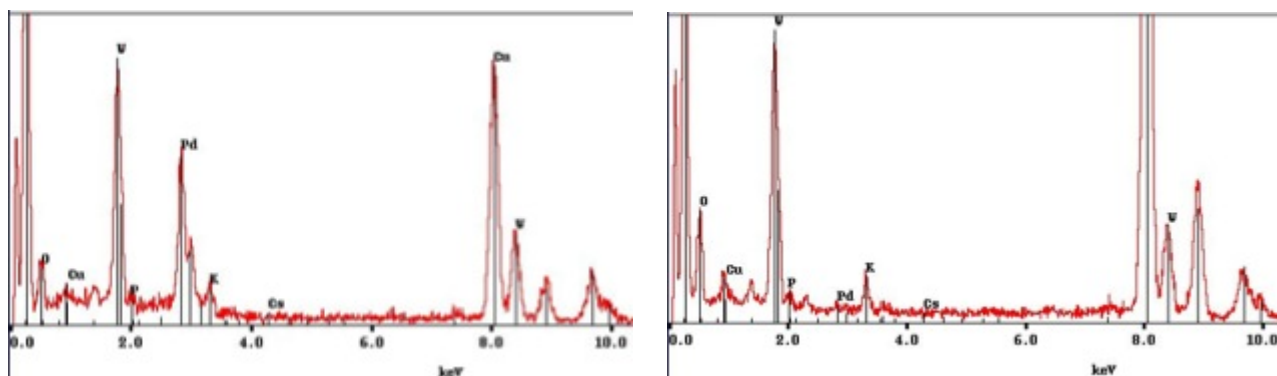

Fig S2: EDX spectra of a single NP of  $\text{Pd}^0$  stabilized by  $[\text{PW}_{11}\text{O}_{39}]^{7-}$  anions (left) and of the amorphous materials around the NPs of  $\text{Pd}^0$  stabilized by  $[\text{PW}_{11}\text{O}_{39}]^{7-}$  anions (right).

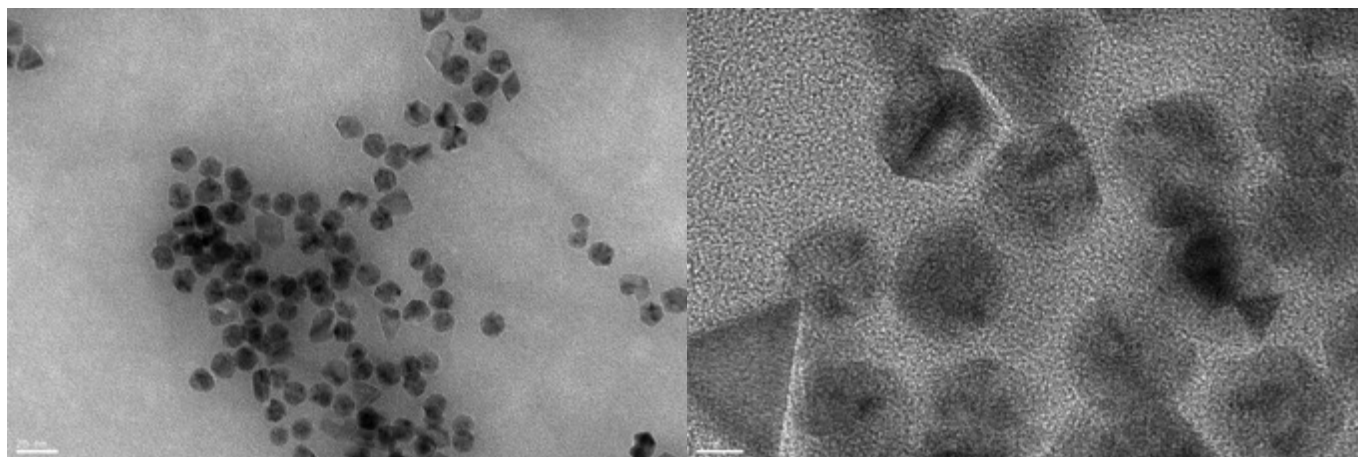

Fig S3: HR TEM micrographs of NPs of Pd<sup>0</sup> stabilized by [PW<sub>11</sub>O<sub>39</sub>]<sup>7-</sup> anions at 2 magnifications. The size of the bars in the left corners corresponds to 20 (left) and 5 nm (right) respectively. The picture on the right correspond to the entire micrograph from which the NPs displayed in figure 4 are taken from.

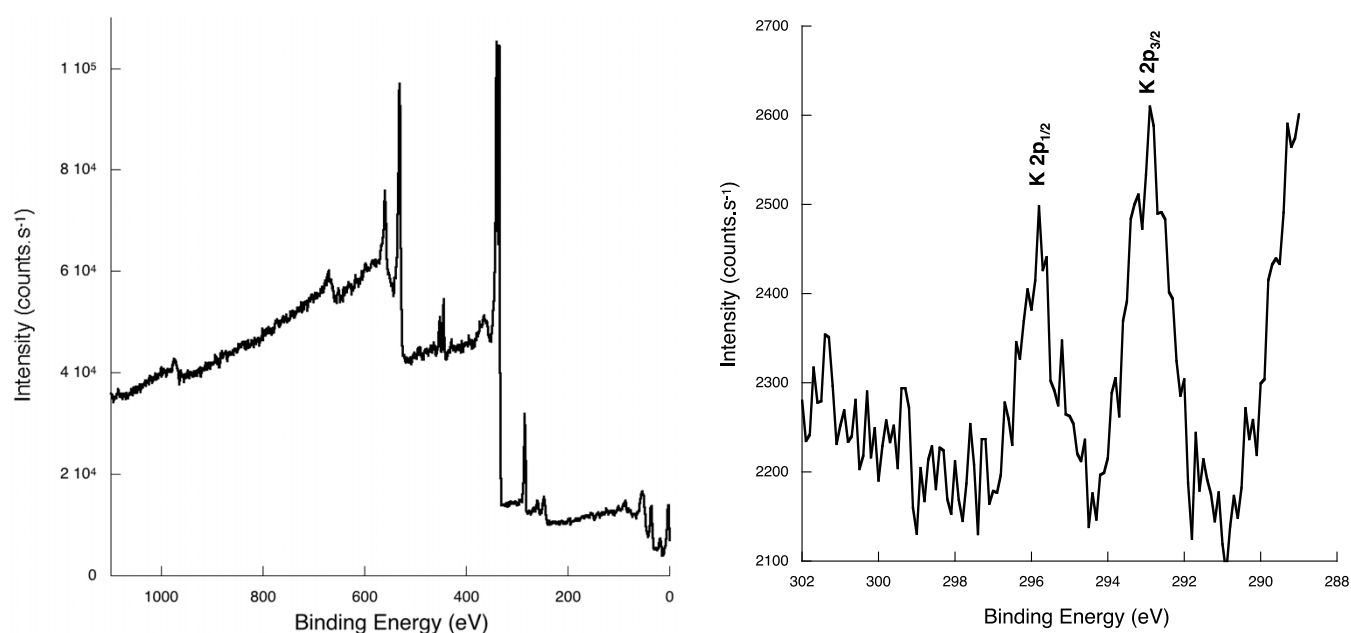

Fig S4: Full XPS spectrum (left) and high resolution K2p spectrum (right) of a solid sample of Pd<sup>0</sup> NPs stabilized by [PW<sub>11</sub>O<sub>39</sub>]<sup>7-</sup> anions prepared by precipitation and filtration of POMs-decorated NPs obtained by reduction of a highly concentrated solution of compound **3** (initial concentration of **3** = 5.10<sup>-3</sup> mol L<sup>-1</sup>).

|                                                       | <b>Cs<sub>6</sub>K<sub>6</sub>[PdAs<sub>2</sub>W<sub>19</sub>O<sub>67</sub>(H<sub>2</sub>O)]≈7H<sub>2</sub>O</b> |
|-------------------------------------------------------|------------------------------------------------------------------------------------------------------------------|
| Empirical formula                                     | As <sub>2</sub> Cs <sub>6</sub> K <sub>6</sub> O <sub>75</sub> PdW <sub>19</sub>                                 |
| Formula weight                                        | 5981.45                                                                                                          |
| Crystal system                                        | triclinic                                                                                                        |
| Space group                                           | <i>P</i> <sub>1</sub>                                                                                            |
| <i>a</i> [Å]                                          | 12.5599(6)                                                                                                       |
| <i>b</i> [Å]                                          | 12.9532(6)                                                                                                       |
| <i>c</i> [Å]                                          | 30.1487(15)                                                                                                      |
| <i>α</i> [°]                                          | 80.150(3)                                                                                                        |
| <i>β</i> [°]                                          | 84.645(3)                                                                                                        |
| <i>γ</i> [°]                                          | 67.299(2)                                                                                                        |
| <i>V</i> [Å <sup>3</sup> ]                            | 4456.2(4)                                                                                                        |
| <i>Z</i>                                              | 2                                                                                                                |
| <i>D</i> <sub>calculated</sub> [Mg/m <sup>3</sup> ]   | 4.458                                                                                                            |
| <i>μ</i> [mm <sup>-1</sup> ]                          | 28.132                                                                                                           |
| <i>F</i> (000)                                        | 5124                                                                                                             |
| Crystal size [mm <sup>3</sup> ]                       | 0.15x0.10x0.05                                                                                                   |
| <i>θ</i> range [°]                                    | 2.55 – 30.10                                                                                                     |
|                                                       | -17 < <i>h</i> < 17                                                                                              |
| Index ranges                                          | -17 < <i>k</i> < 18                                                                                              |
|                                                       | -42 < <i>l</i> < 42                                                                                              |
| Refl. collected/unique                                | 25329/16611                                                                                                      |
| Data/restraints/parameters                            | 16611/0/1006                                                                                                     |
| Goodness-of-fit on <i>F</i> <sup>2</sup>              | 1.040                                                                                                            |
| Final <i>R</i> indices [ <i>I</i> > 2σ( <i>I</i> )]   | <i>R</i> <sub>1</sub> = 0.1211                                                                                   |
|                                                       | <i>wR</i> <sub>2</sub> = 0.3851                                                                                  |
| <i>R</i> indices (all data)                           | <i>R</i> <sub>1</sub> = 0.1654                                                                                   |
|                                                       | <i>wR</i> <sub>2</sub> = 0.3452                                                                                  |
| Largest difference peak and hole [e.Å <sup>-3</sup> ] | 6.118 and -6.714                                                                                                 |
| CSD deposition numbers                                | 427416                                                                                                           |

Table S5: crystallographic data for compound Cs<sub>6</sub>K<sub>6</sub>[PdAs<sub>2</sub>W<sub>19</sub>O<sub>67</sub>(H<sub>2</sub>O)]≈7H<sub>2</sub>O which contains the anion of **4**.
